# Supplementary material for: Blood transcriptomic signatures associated with molecular changes in the brain and clinical outcomes in Parkinson’s disease
Source: PubMed Central journal article supplement (PMC10322907; doi:10.1038/s41467-023-39652-6), 2023-07-05
Supplement: 41467_2023_39652_MOESM3_ESM.pdf [file 41467_2023_39652_MOESM3_ESM.pdf]

## Description of Additional Supplementary Data Files

### Data S1

Metadata for all brain donors used in this study.

### Data S2

Comparison of demographics for brain donors. Two-sided Wilcoxon and Fisher's tests were used for comparisons and resulting p values are given in the table.

### Data S3

Protein levels (ng/ml) of Tyrosine hydroxylase detected by Enzyme-linked immunosorbent assay (ELISA) in 120 mg caudate tissue from control (n=4) and PD (n=35) donors.

### Data S4

Differential gene expression analysis (measured using limma on gene counts) in putamen from PD vs control donors. p values were calculated by limma, and multiple correction was performed using the Benjamini-Hochberg method.

### Data S5

Differential gene expression analysis (measured using limma) in caudate from PD vs control donors. p values were calculated by limma, and multiple correction was performed using the Benjamini-Hochberg method.

### Data S6

Enrichment scores for GO terms generated from GSEA in control and PD putamen.

### Data S7

Enrichment scores for GO terms generated from GSEA in control and PD caudate.

### Data S8

Differentially changed GO terms (measured using limma on Enrichment scores (Data S6)) in PD vs control putamen. Enrichment scores were calculated with the GSEA R package, and limma was used to calculate p values for differential pathway expression. Multiple correction was performed using the Benjamini-Hochberg method.

### Data S9

Differentially changed GO terms (measured using limma on Enrichment scores (Data S7)) in PD vs control caudate. Enrichment scores were calculated with the GSEA R package, and limma was used to calculate p values for differential pathway expression. Multiple correction was performed using the Benjamini-Hochberg method.

### Data S10

List of highly (absolute ( $\log_2FC > 1$ ) and  $FDR < 0.05$ ) differentially expressed genes (based on statistics from Data 4 and 5) in PD caudate and putamen compared to their respective controls.

#### Data S11

Statistics from ML-Seq analysis for identification of classifier genes in control and PD caudate. Statistics were calculated using the MLSeq R package. The confusion matrix from this analysis is shown. p values were obtained using McNemar test using default parameters from R stats package.

#### Data S12

Protein expression values from mass spectrometry in control and PD caudate. Significance was tested using permutation-based FDR-corrected t-tests.

#### Data S13

Protein expression values from mass spectrometry in control and PD putamen. Significance was tested using permutation-based FDR-corrected t-tests.

#### Data S14

Gene set enrichment analysis (GSEA) to identify GO terms enriched in PD vs Control protein levels in caudate (by Mass Spectrometry). p values were calculated by the fgsea R package and adjusted p values were calculated using the Benjamini-Hochberg method.

#### Data S15

Gene set enrichment analysis (GSEA) to identify GO terms enriched in PD vs Control protein levels in putamen (by Mass Spectrometry). p values were calculated by the fgsea R package and adjusted p values were calculated using the Benjamini-Hochberg method.

#### Data S16

Comparison of demographics for PPMI subjects. Two-sided Wilcoxon and Fisher's tests were used for comparisons and resulting p values are given in the table.

#### Data S17

Differential gene expression analysis (measured using limma) in blood from PD vs control subjects in the PPMI study. p values were calculated by limma, and multiple correction was performed using the Benjamini-Hochberg method.

#### Data S18

Differential gene expression analysis (measured using limma) in blood from PD vs control subjects in the PDBP study. p values were calculated by limma, and multiple correction was performed using the Benjamini-Hochberg method.

#### Data S19

Differentially changed GO terms in PD vs control subjects in the PPMI study. Enrichment scores were calculated with the GSEA R package, and limma was used to calculate p values for

differential pathway expression. Multiple correction was performed using the Benjamini-Hochberg method.

#### Data S20

Differential gene expression analysis (measured using limma) in genetic carriers vs control subjects in the PPMI study. p values were calculated by limma, and multiple correction was performed using the Benjamini-Hochberg method.

#### Data S21

Limma analysis to identify genes that correlate with LEDD values in PD subjects of the PPMI study. p values were calculated by limma, and multiple correction was performed using the Benjamini-Hochberg method.

#### Data S22

Differential gene expression analysis (measured using limma) in blood from drug naïve PD vs control subjects in the PPMI study. p values were calculated by limma, and multiple correction was performed using the Benjamini-Hochberg method.

#### Data S23

Differentially changed GO terms in drug naïve PD vs control subjects in the PPMI study. Enrichment scores were calculated with the GSVA R package, and limma was used to calculate p values for differential pathway expression. Multiple correction was performed using the Benjamini-Hochberg method.

#### Data S24

Demographics for PD donors with and without dementia. Two-sided Wilcoxon and Fisher's tests were used for comparisons and resulting p values are given in the table.

#### Data S25

Differential gene expression analysis (measured using limma) in putamen of PD donors with dementia vs PD donors without dementia. p values were calculated by limma, and multiple correction was performed using the Benjamini-Hochberg method.

#### Data S26

Differential gene expression analysis (measured using limma) in caudate of PD donors with dementia vs PD donors without dementia. p values were calculated by limma, and multiple correction was performed using the Benjamini-Hochberg method.

#### Data S27

Differentially changed GO terms in caudate of PD donors with dementia vs PD donors without dementia. Enrichment scores were calculated with the GSVA R package, and limma was used to calculate p values for differential pathway expression. Multiple correction was performed using the Benjamini-Hochberg method.

#### Data S28

Differentially changed GO terms in putamen of PD donors with dementia vs PD donors without dementia. Enrichment scores were calculated with the GSEA R package, and limma was used to calculate p values for differential pathway expression. Multiple correction was performed using the Benjamini-Hochberg method.

#### Data S29

Demographics for PD subjects with and without cognitive impairment in the PPMI study. Two-sided Wilcoxon and Fisher's tests were used for comparisons and resulting p values are given in the table.

#### Data S30

Differential gene expression in PD subjects with cognitive impairment vs PD subjects without cognitive impairment in the PPMI study. p values were calculated by limma, and multiple correction was performed using the Benjamini-Hochberg method.

#### Data S31

Differentially changed GO terms in PD subjects with cognitive impairment vs PD subjects without cognitive impairment in the PPMI study. Enrichment scores were calculated with the GSEA R package, and limma was used to calculate p values for differential pathway expression. Multiple correction was performed using the Benjamini-Hochberg method.

#### Data S32

Demographics for PD brain donors with and without history of dyskinesia. Two-sided Wilcoxon and Fisher's tests were used for comparisons and resulting p values are given in the table.

#### Data S33

Differential gene expression analysis (measured using limma) in putamen of PD donors with history of dyskinesia vs PD donors without history of dyskinesia. p values were calculated by limma, and multiple correction was performed using the Benjamini-Hochberg method.

#### Data S34

Differential gene expression analysis (measured using limma) in caudate of PD donors with history of dyskinesia vs PD donors without history of dyskinesia. p values were calculated by limma, and multiple correction was performed using the Benjamini-Hochberg method.

#### Data S35

Differential gene expression analysis (measured using limma) in blood of PD subjects in the PPMI study with history of dyskinesia vs PD subjects without history of dyskinesia. p values were calculated by limma, and multiple correction was performed using the Benjamini-Hochberg method.

#### Data S36

Differentially changed GO terms in putamen of PD donors with dyskinesia vs PD donors without dyskinesia. Enrichment scores were calculated with the GSEA R package, and limma was used to calculate p values for differential pathway expression. Multiple correction was performed using the Benjamini-Hochberg method.

#### Data S37

Differentially changed GO terms in caudate of PD donors with dyskinesia vs PD donors without dyskinesia. Enrichment scores were calculated with the GSEA R package, and limma was used to calculate p values for differential pathway expression. Multiple correction was performed using the Benjamini-Hochberg method.

#### Data S38

Demographics for earlier-onset and later-onset PD brain donors. Two-sided Wilcoxon and Fisher's tests were used for comparisons and resulting p values are given in the table.

#### Data S39

Differential gene expression analysis (measured using limma) in caudate of later-onset PD versus control donors. p values were calculated by limma, and multiple correction was performed using the Benjamini-Hochberg method.

#### Data S40

Differential gene expression analysis (measured using limma) in putamen of later-onset PD versus control donors. p values were calculated by limma, and multiple correction was performed using the Benjamini-Hochberg method.

#### Data S41

Differential gene expression analysis (measured using limma) in putamen of earlier-onset PD versus control donors. p values were calculated by limma, and multiple correction was performed using the Benjamini-Hochberg method.

#### Data S42

Differential gene expression analysis (measured using limma) in caudate of earlier-onset PD versus control donors. p values were calculated by limma, and multiple correction was performed using the Benjamini-Hochberg method.

#### Data S43

Differentially changed GO terms in putamen of later-onset PD donors vs control donors. Enrichment scores were calculated with the GSEA R package, and limma was used to calculate p values for differential pathway expression. Multiple correction was performed using the Benjamini-Hochberg method.

#### Data S44

Differentially changed GO terms in caudate of later-onset PD donors vs control donors. Enrichment scores were calculated with the GSEA R package, and limma was used to calculate p values for differential pathway expression. Multiple correction was performed using the Benjamini-Hochberg method.

#### Data S45

Demographics for PD subjects with earlier and later onset PD in PPMI study. Two-sided Wilcoxon and Fisher's tests were used for comparisons and resulting p values are given in the table.

#### Data S46

Differential gene expression analysis (measured using limma) in blood of later-onset PD versus control subjects in the PPMI study. p values were calculated by limma, and multiple correction was performed using the Benjamini-Hochberg method.

#### Data S47

Differential gene expression analysis (measured using limma) in blood of earlier-onset PD versus control subjects in the PPMI study. p values were calculated by limma, and multiple correction was performed using the Benjamini-Hochberg method.

#### Data S48

Pathway association with disease duration using splines regression models on GO term enrichment scores (Data S7) in caudate. Enrichment scores were calculated with the GSEA R package, and limma was used to calculate p values for differential pathway expression. Multiple correction was performed using the Benjamini Hochberg method.

#### Data S49

Pathway association with disease duration using splines regression models on GO term enrichment scores (Data S6) in putamen. Enrichment scores were calculated with the GSEA R package, and limma was used to calculate p values for differential pathway expression. Multiple correction was performed using the Benjamini-Hochberg method.
